# Supplementary material for: Universal Pacemaker of Genome Evolution
Source: PubMed Central journal article supplement (PMC3510094; doi:10.1371/journal.pcbi.1002785), 2012-11-29
Supplement: pcbi.1002785.s001.pdf [file pcbi.1002785.s001.pdf]

MC-constrained (ultrametric) supertree

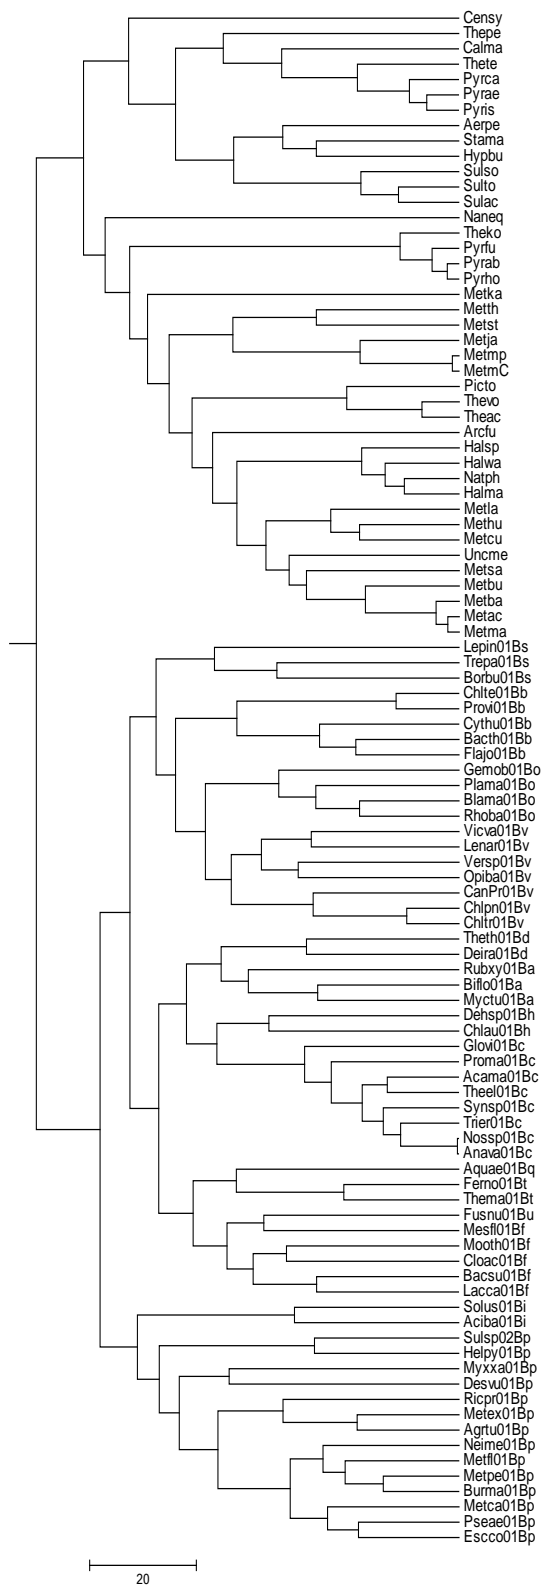

Unconstrained (UPM) supertree

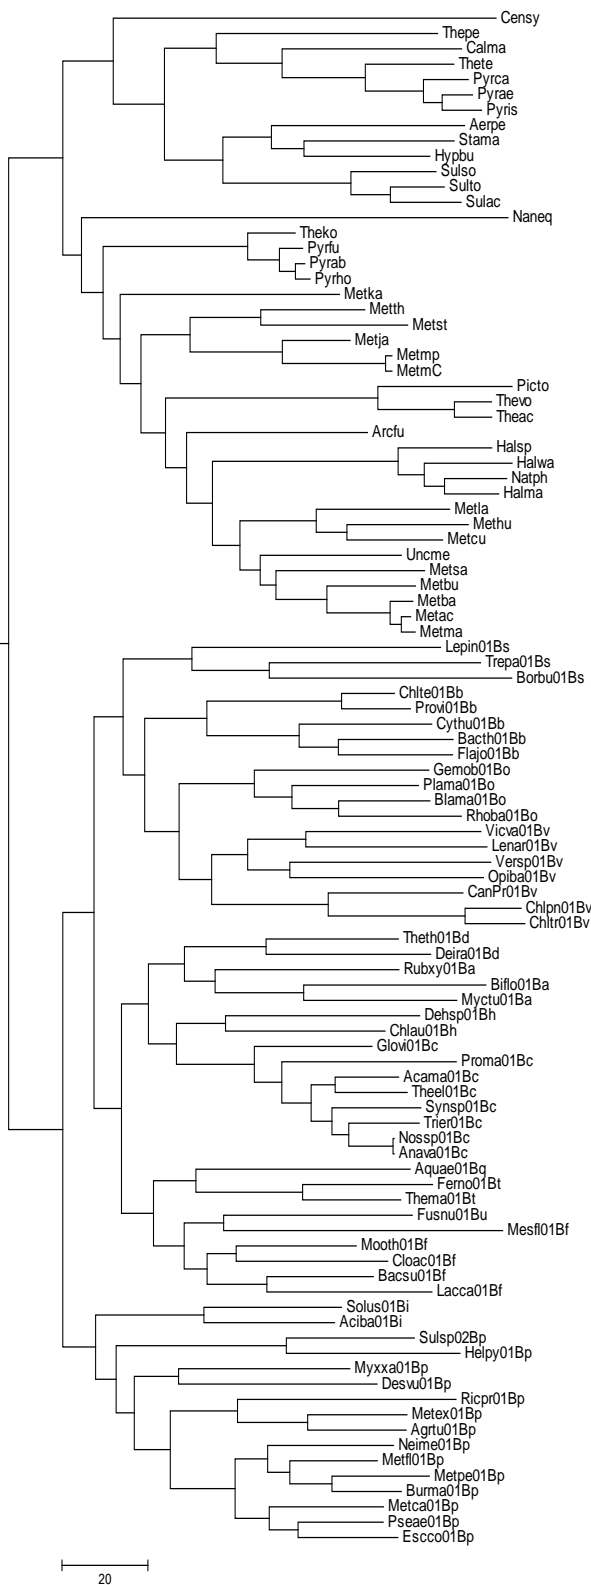

## MC-optimized supertree, Newick format.

((Censy:61.8869,(Thepe:44.1285,(Calma:33.1595,(Thete:18.9522,(Pyrca:9.1778,(Pyrac:5.9390,Pyris:5.9390):3.2388):9.7744):14.2072):10.9690):8.9634,((Aerpe:33.0161,(Stama:26.7236,Hypbu:26.7236):6.2925):9.1865,(Sulso:18.3712,(Sulto:11.3010,Sulac:11.3010):7.0703):23.8314):10.8892):8.7951):8.4681,(Naneq:66.3254,(Theko:11.0283,(Pyrfu:5.0095,(Pyrab:2.1686,Pyrho:2.1686):2.8409):6.0188):50.7054,(Metka:58.3823,(((Metth:26.7240,Metst:26.7240):15.6488,(Metja:18.5184,(Metmp:1.2279,MetmC:1.2279):17.2905):23.8544):11.9734,((Picto:21.0763,(Thevo:6.9803,Theac:6.9803):14.0960):28.9880,(Arcfu:46.2026,((Halsp:18.2850,(Halwa:13.8666,(Natph:10.2491,Halma:10.2491):3.6175):4.4184):23.3907,((Metla:24.0772,(Methu:18.6710,Metcu:18.6710):5.4062):12.1627,(Uncme:31.9038,(Metsa:28.6607,(Metbu:17.6049,(Metba:4.3497,(Metac:2.1720,Metma:2.1720):2.1777):13.2552):11.0558):3.2431):4.3362):5.4357):4.5269):3.8617):4.2820):4.0360):3.3514):4.5918):4.0296):8.8492,(((Lepin01Bs:45.8589,(Trep01Bs:34.1513,Borbu01Bs:34.1513):11.7076):10.9256,(((Chlte01Bb:11.7560,Provi01Bb:11.7560):29.8532,(Cythu01Bb:26.1225,(Bacth01Bb:19.3430,Flajo01Bb:19.3430):6.7795):15.4867):11.5212,((Gemob01Bo:33.7971,(Plama01Bo:26.8322,(Blama01Bo:18.6302,Rhoba01Bo:18.6302):8.2020):6.9649):13.7445,(((Vicva01Bv:27.6823,Lenar01Bv:27.6823):9.3475,(Versp01Bv:30.1312,Opiba01Bv:30.1312):6.8986):5.6725,(CanPr01Bv:27.3706,(Chlpn01Bv:9.8091,Chltr01Bv:9.8091):17.5615):15.3316):4.8393):5.5889):3.6540):4.8775,(((Theth01Bd:28.5267,Deira01Bd:28.5267):16.0194,(Rubxy01Ba:39.4497,(Biflo01Ba:26.4593,Myctu01Ba:26.4593):12.9904):5.0964):6.5052,((Dehsp01Bh:35.5921,Chlau01Bh:35.5921):9.7385,(Glovi01Bc:28.8885,(Proma01Bc:23.8659,(Acama01Bc:13.3682,Theel01Bc:13.3682):4.7123,(Synsp01Bc:14.1482,(Trier01Bc:10.8841,(Noss01Bc:0.2118,Anava01Bc:0.2118):10.6723):3.2641):3.9323):5.7853):5.0227):16.4421):5.7207):5.1948,((Aqua01Bq:41.6984,(Ferno01Bt:21.5559,Thema01Bt:21.5559):20.1425):8.0988,((Fusnu01Bu:36.5353,Mesfl01Bf:36.5353):6.8947,((Mooth01Bf:32.2905,Cloac01Bf:32.2905):6.2299,(Bacsu01Bf:26.5997,Lacca01Bf:26.5997):11.9207):4.9097):6.3671):6.4489):5.4159):5.6010,((Solus01Bi:30.8122,Aciba01Bi:30.8122):29.4297,((Sulsp02Bp:27.0372,Helpy01Bp:27.0372):29.0993,((Myxxa01Bp:43.0730,Desvu01Bp:43.0730):9.3309,(Ricpr01Bp:32.9890,(Metex01Bp:19.0928,Agrtu01Bp:19.0928):13.8962):12.1896,((Neime01Bp:25.4812,(Metfl01Bp:21.3187,(Metpe01Bp:14.1583,Burma01Bp:14.1583):7.1604):4.1624):6.1640,(Metca01Bp:24.6509,(Pseae01Bp:18.8580,Escco01Bp:18.8580):5.7928):6.9943):13.5334):7.2253):3.7327):4.1054):7.0210):11.9412);

## UPM-optimized supertree, Newick format

((Censy:89.0259,(Thepe:51.4890,(Calma:41.7386,(Thete:20.5655,(Pyrca:10.4465,(Pyrac:7.0525,Pyris:9.1721):4.3686):13.5020):19.3299):15.3357):12.0650,((Aerpe:44.9282,(Stama:34.9028,Hypbu:29.2652):7.5422):11.3161,(Sulso:19.7941,(Sulto:12.5176,Sulac:16.4295):9.1575):29.7845):13.5787):11.9140):11.6970,(Naneq:99.2062,(Theko:11.0680,(Pyrfu:5.4038,(Pyrab:2.1754,Pyrho:3.4121):3.7090):7.3922):33.6402,(Metka:50.9979,(((Metth:24.1644,Metst:34.2067):16.4281,(Metja:15.7372,(Metmp:1.5000,MetmC:1.4677):23.9853):21.4609):11.3870,((Picto:31.1798,(Thevo:8.6051,Theac:8.6739):17.7942):49.3736,(Arcfu:42.0494,((Halsp:21.7838,(Halwa:20.4254,(Natph:14.4531,Halma:12.6005):4.7011):6.1063):43.1505,((Metla:31.0090,(Methu:28.2125,Metcu:22.2977):7.1172):17.7435,(Uncme:32.8120,(Metsa:34.5754,(Metbu:20.6189,(Metba:5.2481,(Metac:2.2004,Metma:3.2066):2.6050):14.7119):11.8231):3.6558):4.7029):6.4194):5.9909):4.8941):5.7240):4.8166):3.9425):5.0274):4.3704):12.6121,(((Lepin01Bs:57.8117,(Trep01Bs:49.1454,Borbu01Bs:56.3925):17.9829):16.0285,(((Chlte01Bb:12.2697,Provi01Bb:16.0112):31.3288,(Cythu01Bb:30.8345,(Bacth01Bb:26.6925,Flajo01Bb:26.5281):9.1256):21.4746):14.4231,((Gemob01Bo:40.5998,(Plama01Bo:29.4117,(Blama01Bo:21.2192,Rhoba01Bo:28.5604):10.8598):8.7642):17.4646,(((Vicva01Bv:40.7170,Lenar01Bv:42.1258):13.5515,(Versp01Bv:46.7282,Opiba01Bv:45.0404):9.7755):8.3447,(CanPr01Bv:31.3328,(Chlpn01Bv:13.0385,Chltr01Bv:13.8949):31.8389):27.0921):7.5969):8.0290):5.0101):6.7397,(((Theth01Bd:30.7799,Deira01Bd:38.2666):18.9921,(Rubxy01Ba:42.7450,(Biflo01Ba:42.3532,Myctu01Ba:35.5812):20.5856):7.1378):8.3914,((Dehsp01Bh:45.1610,Chlau01Bh:37.0665):11.3927,(Glovi01Bc:27.3297,(Proma01Bc:40.5533,((Acama01Bc:14.7899,Theel01Bc:16.7404):5.5897,(Synsp01Bc:20.6511,(Trier01Bc:16.3717,(Noss01Bc:0.2758,Anava01Bc:0.2406):10.3218):3.8772):4.8466):6.8180):6.4049):18.1139):6.5438):6.2510,((Aqua01Bq:49.7884,(Ferno01Bt:30.2272,Thema01Bt:22.8174):24.8129):9.8613,((Fusnu01Bu:43.8391,Mesfl01Bf:64.8579):9.1732,((Mooth01Bf:27.9007,Cloac01Bf:35.2075):6.7564,(Bacsu01Bf:24.7567,Lacca01Bf:38.3900):13.8760):5.3383):7.1576):7.4726):6.3673):7.2299,((Solus01Bi:32.0055,A

ciba01Bi:30.4161):25.2051,((Sulsp02Bp:29.7525,Helpy01Bp:40.3668):39.5585,((Myxa01Bp:39.8124,De  
svu01Bp:46.1556):10.2976,((Ricpr01Bp:50.8076,(Metex01Bp:23.0949,Agtru01Bp:22.8619):16.3410):15.6  
247,((Neime01Bp:29.2603,(Meffl01Bp:20.3604,(Metpe01Bp:22.6169,Burma01Bp:16.1408):9.8286):5.144  
9):7.5865,(Metca01Bp:26.5222,(Pseae01Bp:19.7872,Escco01Bp:23.2288):6.6808):7.9313):15.0439):8.3  
809):4.2225):4.7923):7.6533):12.6121);

### GT relative evolution rates optimized under the UPMmodel.

| GT      | r       | GT      | R       | GT      | r       | GT      | r       |
|---------|---------|---------|---------|---------|---------|---------|---------|
| COG0201 | 0.76659 | COG0043 | 1.02903 | COG2007 | 0.98454 | COG1608 | 1.30463 |
| COG0086 | 0.74428 | COG0214 | 0.40733 | COG1853 | 1.39015 | COG2003 | 1.29369 |
| COG0085 | 0.57485 | COG0537 | 0.65288 | COG1471 | 0.94314 | COG0710 | 1.29338 |
| COG0480 | 0.62635 | COG1690 | 0.73195 | COG0290 | 0.77355 | COG1048 | 0.73188 |
| COG0504 | 0.78924 | COG0382 | 1.07937 | COG1594 | 0.34193 | COG1042 | 1.15700 |
| COG0093 | 0.41826 | COG1269 | 1.47665 | COG0058 | 1.10634 | COG1625 | 1.29514 |
| COG0468 | 0.55648 | COG0089 | 0.89662 | COG0190 | 0.86204 | COG0260 | 1.23970 |
| COG0525 | 0.83753 | COG0473 | 0.85938 | COG0852 | 1.08477 | COG0199 | 0.77174 |
| COG0016 | 0.72347 | COG1121 | 1.13051 | COG1014 | 1.04632 | COG5257 | 0.87199 |
| COG0013 | 0.91729 | COG0456 | 1.05452 | COG0836 | 1.15020 | COG0855 | 1.18751 |
| COG0098 | 0.56956 | COG0365 | 0.77654 | COG0839 | 1.03830 | COG1559 | 1.48917 |
| COG0343 | 0.78057 | COG0111 | 0.87715 | COG0542 | 0.89556 | COG2520 | 1.62905 |
| COG0750 | 1.39272 | COG0249 | 1.17856 | COG0228 | 0.59366 | COG1685 | 1.22133 |
| COG0097 | 1.00246 | COG4974 | 1.45818 | COG1573 | 1.05012 | COG2082 | 0.82301 |
| COG0092 | 0.64926 | COG0206 | 0.54019 | COG0816 | 1.12410 | COG2509 | 0.84302 |
| COG0244 | 1.05110 | COG1009 | 0.83301 | COG0566 | 1.33356 | COG0569 | 1.15431 |
| COG0532 | 0.72680 | COG0289 | 0.95033 | COG0560 | 1.03877 | COG0601 | 1.20093 |
| COG0231 | 0.69596 | COG0484 | 0.91040 | COG1235 | 1.04185 | COG1727 | 0.86057 |
| COG0081 | 0.80031 | COG0007 | 0.79837 | COG1537 | 1.55506 | COG0623 | 0.80780 |
| COG0087 | 0.76958 | COG1257 | 0.71650 | COG1709 | 1.02474 | COG1252 | 1.32188 |
| COG0197 | 0.61709 | COG0402 | 1.20095 | COG1207 | 1.09790 | COG1116 | 0.87597 |
| COG2812 | 1.11201 | COG1158 | 0.58018 | COG2139 | 0.73993 | COG0662 | 0.99834 |
| COG0049 | 0.55139 | COG1156 | 0.52007 | COG1912 | 1.32528 | COG0661 | 1.27160 |
| COG0250 | 0.79122 | COG2217 | 1.05886 | COG0404 | 0.95515 | COG1339 | 1.52523 |
| COG0611 | 1.27552 | COG0445 | 0.77927 | COG0669 | 0.79079 | COG0680 | 1.13726 |
| COG0174 | 0.78501 | COG1782 | 0.82351 | COG1136 | 0.66862 | COG0446 | 1.37251 |
| COG0341 | 1.09573 | COG0377 | 0.50361 | COG2239 | 1.36952 | COG0160 | 0.87754 |
| COG0528 | 1.16007 | COG1514 | 1.58883 | COG0168 | 1.33363 | COG0166 | 1.31055 |
| COG0099 | 0.68518 | COG0129 | 0.75540 | COG0318 | 1.15754 | COG1370 | 1.74534 |
| COG0143 | 0.97782 | COG0330 | 0.92910 | COG0319 | 1.11615 | COG0768 | 1.47845 |
| COG0449 | 0.97982 | COG1058 | 1.15933 | COG1193 | 1.60938 | COG1325 | 1.67022 |
| COG0020 | 1.24637 | COG0041 | 0.56519 | COG1192 | 1.23492 | COG1491 | 1.00016 |
| COG0495 | 0.88084 | COG0825 | 0.88937 | COG0769 | 1.23518 | COG0375 | 1.49351 |
| COG2262 | 1.09423 | COG0009 | 0.99503 | COG0766 | 0.97067 | COG0591 | 1.24755 |
| COG0151 | 0.90947 | COG0613 | 0.78929 | COG0379 | 0.89877 | COG0743 | 0.85781 |
| COG0522 | 0.66373 | COG1249 | 1.14267 | COG0590 | 0.97253 | COG1730 | 1.77445 |
| COG0018 | 1.26960 | COG0517 | 0.78442 | COG0123 | 1.02003 | COG0703 | 1.87040 |
| COG0441 | 0.99291 | COG0512 | 0.72607 | COG1650 | 1.74272 | COG1097 | 1.04985 |
| COG0126 | 1.08415 | COG0157 | 0.96035 | COG0720 | 0.92977 | COG1679 | 1.16357 |
| COG0358 | 0.64552 | COG1793 | 0.91862 | COG0728 | 1.92991 | COG2016 | 1.42142 |
| COG0060 | 0.82364 | COG1364 | 0.88986 | COG0335 | 0.57289 | COG0331 | 1.13728 |
| COG0498 | 0.75476 | COG0131 | 0.77273 | COG0332 | 1.07638 | COG1849 | 1.25738 |
| COG0008 | 0.71071 | COG0713 | 0.74708 | COG1841 | 0.58139 | COG4172 | 0.95584 |
| COG0037 | 0.89751 | COG0297 | 1.11054 | COG1460 | 1.36887 | COG1281 | 1.34124 |
| COG1293 | 1.58192 | COG0059 | 0.61443 | COG0253 | 0.98016 | COG1079 | 1.72025 |
| COG0052 | 0.70071 | COG0501 | 0.65141 | COG0252 | 0.97991 | COG1056 | 0.74613 |

|         |         |         |         |         |         |         |         |
|---------|---------|---------|---------|---------|---------|---------|---------|
| COG0541 | 0.91729 | COG0520 | 0.94361 | COG2038 | 0.92022 | COG1586 | 0.65624 |
| COG0462 | 0.98914 | COG0209 | 0.72251 | COG1829 | 1.62293 | COG1631 | 0.63565 |
| COG0100 | 0.32215 | COG1219 | 0.55214 | COG0068 | 1.17027 | COG0864 | 0.77593 |
| COG0048 | 0.45755 | COG0605 | 0.80736 | COG0275 | 1.05488 | COG1595 | 0.98005 |
| COG0452 | 1.09789 | COG0420 | 1.08108 | COG1051 | 0.87224 | COG0021 | 1.03339 |
| COG0030 | 1.55036 | COG2255 | 0.81615 | COG0515 | 1.30067 | COG0026 | 1.16071 |
| COG0072 | 1.14843 | COG0461 | 1.18150 | COG1030 | 1.45098 | COG0821 | 0.69381 |
| COG0505 | 0.79836 | COG0469 | 1.17664 | COG0023 | 0.41005 | COG0004 | 0.98804 |
| COG0423 | 0.75524 | COG0681 | 1.11063 | COG0234 | 0.60813 | COG1980 | 0.60786 |
| COG0102 | 0.88018 | COG1488 | 1.05865 | COG1205 | 1.24680 | COG1691 | 1.09648 |
| COG0064 | 0.86711 | COG0323 | 1.23547 | COG0807 | 1.13263 | COG1226 | 1.04001 |
| COG0061 | 1.44143 | COG0761 | 0.94939 | COG3642 | 1.10257 | COG0638 | 0.71963 |
| COG0539 | 0.85657 | COG0372 | 0.72966 | COG1522 | 0.83708 | COG0389 | 1.25994 |
| COG0552 | 0.70265 | COG1358 | 0.54296 | COG1527 | 1.99849 | COG0652 | 0.51199 |
| COG0200 | 0.66051 | COG0740 | 0.67582 | COG1389 | 1.07081 | COG0651 | 1.39146 |
| COG0015 | 0.92994 | COG0745 | 1.10459 | COG1385 | 1.34786 | COG1387 | 1.17371 |
| COG0644 | 0.93176 | COG0746 | 1.47474 | COG2263 | 2.74794 | COG1384 | 1.21352 |
| COG1196 | 1.47375 | COG0721 | 1.14903 | COG0438 | 1.61094 | COG1900 | 1.26485 |
| COG0373 | 1.31021 | COG1093 | 1.16562 | COG0673 | 1.22747 | COG1798 | 1.35330 |
| COG0046 | 1.18628 | COG1077 | 0.58895 | COG2243 | 1.30364 | COG1303 | 1.21823 |
| COG0237 | 1.30718 | COG0066 | 0.86123 | COG2241 | 1.53438 | COG1300 | 1.62818 |
| COG0177 | 1.12825 | COG0182 | 1.09469 | COG0479 | 0.87784 | COG0799 | 0.75827 |
| COG0119 | 0.73486 | COG0045 | 0.84648 | COG1126 | 0.77581 | COG0170 | 1.63807 |
| COG0608 | 1.42897 | COG1044 | 1.03873 | COG1437 | 0.94515 | COG1968 | 1.56306 |
| COG0621 | 1.20230 | COG0210 | 0.94136 | COG0309 | 1.16254 | COG0367 | 1.41626 |
| COG0460 | 0.90684 | COG0618 | 0.82369 | COG0307 | 1.17850 | COG1515 | 1.50605 |
| COG0106 | 0.98183 | COG0576 | 1.02905 | COG1308 | 0.78767 | COG0772 | 1.62318 |
| COG0150 | 1.03973 | COG1222 | 0.70630 | COG1163 | 1.15282 | COG1646 | 1.06186 |
| COG0024 | 0.89003 | COG0470 | 1.63869 | COG0014 | 0.87291 | COG1645 | 1.30796 |
| COG0496 | 1.14687 | COG1498 | 1.08868 | COG0793 | 1.07617 | COG3252 | 0.90987 |
| COG0574 | 0.80595 | COG1499 | 1.63816 | COG2433 | 1.78802 | COG0283 | 1.06986 |
| COG0088 | 1.03173 | COG1492 | 1.10080 | COG0360 | 1.05611 | COG1668 | 1.47739 |
| COG2226 | 1.04574 | COG0303 | 1.40653 | COG1180 | 0.88611 | COG2061 | 1.39521 |
| COG0329 | 0.89497 | COG0171 | 1.17206 | COG0777 | 0.74292 | COG1412 | 1.01441 |
| COG0152 | 0.95491 | COG0139 | 0.59543 | COG1648 | 1.43158 | COG1413 | 2.03424 |
| COG0342 | 1.19611 | COG1087 | 1.04984 | COG0347 | 0.58525 | COG0730 | 1.72258 |
| COG0137 | 0.93423 | COG0074 | 0.57353 | COG2064 | 1.09163 | COG0731 | 1.19713 |
| COG0195 | 0.99073 | COG0294 | 1.17745 | COG1872 | 1.39609 | COG1473 | 1.24622 |
| COG0548 | 0.88610 | COG1047 | 1.32694 | COG1067 | 0.75886 | COG2108 | 1.38058 |
| COG0149 | 0.68745 | COG1624 | 1.05126 | COG1599 | 1.57175 | COG0718 | 1.03812 |
| COG0127 | 0.90122 | COG0203 | 0.66105 | COG1040 | 1.26847 | COG1043 | 1.30348 |
| COG0181 | 0.92494 | COG0010 | 0.73317 | COG1831 | 1.55949 | COG1622 | 1.05466 |
| COG0044 | 1.16396 | COG0544 | 1.43108 | COG0056 | 0.65005 | COG1628 | 1.99996 |
| COG0188 | 0.82835 | COG0838 | 0.93030 | COG1459 | 1.33214 | COG1830 | 0.64211 |
| COG0080 | 0.55043 | COG0547 | 1.15402 | COG0263 | 0.94948 | COG0055 | 0.44789 |
| COG0084 | 1.35565 | COG0019 | 1.15644 | COG0261 | 0.97888 | COG1452 | 1.71589 |
| COG0459 | 0.76643 | COG1746 | 1.48106 | COG0196 | 1.26201 | COG1008 | 1.11611 |
| COG0130 | 0.87954 | COG0602 | 1.37891 | COG0524 | 1.15785 | COG0546 | 1.63506 |
| COG0078 | 0.87954 | COG1208 | 1.22686 | COG0543 | 1.16311 | COG1763 | 0.91157 |
| COG0054 | 0.78785 | COG0422 | 0.47169 | COG0223 | 1.16463 | COG1995 | 1.48861 |
| COG0012 | 0.98610 | COG0648 | 1.15306 | COG0221 | 0.96906 | COG1992 | 1.57132 |
| COG2256 | 1.09824 | COG3425 | 0.69307 | COG1571 | 1.63061 | COG0220 | 1.27543 |
| COG0094 | 0.94158 | COG0616 | 1.10984 | COG0482 | 1.25094 | COG0227 | 0.82164 |
| COG0090 | 0.68000 | COG0442 | 1.01943 | COG0815 | 1.86908 | COG0224 | 0.81896 |
| COG0165 | 1.13653 | COG0317 | 1.05641 | COG0817 | 1.17767 | COG1518 | 1.27173 |
| COG0103 | 0.51619 | COG1355 | 1.10836 | COG0563 | 1.18852 | COG1721 | 1.07445 |

|         |         |         |         |         |         |         |         |
|---------|---------|---------|---------|---------|---------|---------|---------|
| COG0104 | 0.93108 | COG0299 | 0.89718 | COG0607 | 1.02145 | COG1534 | 1.31853 |
| COG0215 | 0.75964 | COG0747 | 1.36849 | COG0609 | 1.29973 | COG1899 | 1.04362 |
| COG2890 | 1.63654 | COG0357 | 1.16865 | COG0628 | 1.40409 | COG0643 | 0.99586 |
| COG0002 | 1.02139 | COG1676 | 1.36212 | COG0626 | 0.94278 | COG0095 | 1.50039 |
| COG0794 | 0.71903 | COG1467 | 1.36572 | COG0620 | 1.05048 | COG0407 | 1.18716 |
| COG1185 | 1.01255 | COG4775 | 1.66210 | COG1390 | 1.49560 | COG0405 | 1.35045 |
| COG0113 | 0.81852 | COG0183 | 0.73762 | COG3635 | 1.26950 | COG1132 | 1.05303 |
| COG0051 | 0.35033 | COG0247 | 0.72174 | COG1259 | 0.85034 | COG1938 | 1.39553 |
| COG0017 | 0.79976 | COG0212 | 1.24342 | COG0399 | 0.90712 | COG1933 | 1.17167 |
| COG0606 | 1.06948 | COG0493 | 0.88038 | COG0665 | 1.67869 | COG0467 | 0.45477 |
| COG0649 | 0.67223 | COG0005 | 0.65929 | COG0668 | 0.87568 | COG0687 | 1.31743 |
| COG0091 | 0.62947 | COG1530 | 0.97552 | COG1137 | 0.68666 | COG1331 | 1.41991 |
| COG0465 | 0.69651 | COG0809 | 1.21114 | COG0463 | 0.85738 | COG1216 | 1.37655 |
| COG1197 | 1.07689 | COG0571 | 1.46134 | COG1210 | 1.10644 | COG1311 | 1.26972 |
| COG4770 | 0.62865 | COG0413 | 0.89587 | COG0444 | 0.91834 | COG1171 | 0.76063 |
| COG0185 | 0.48139 | COG1102 | 1.21385 | COG1173 | 1.18957 | COG0781 | 0.81548 |
| COG0001 | 0.80702 | COG2101 | 0.45266 | COG2078 | 0.95997 | COG0162 | 1.13176 |
| COG0558 | 1.15246 | COG2220 | 0.97497 | COG1867 | 1.50495 | COG3264 | 1.24604 |
| COG0519 | 0.72821 | COG0450 | 0.45990 | COG0352 | 1.13434 | COG1324 | 1.04268 |
| COG0472 | 1.31439 | COG1161 | 1.28711 | COG0350 | 0.78654 | COG2058 | 0.69646 |
| COG1160 | 0.97641 | COG0179 | 0.79900 | COG0355 | 0.92744 | COG0378 | 0.75317 |
| COG0368 | 0.98358 | COG1363 | 0.99962 | COG1446 | 1.00630 | COG0596 | 1.45504 |
| COG0034 | 0.98243 | COG0589 | 1.24388 | COG1634 | 1.46318 | COG0598 | 2.08279 |
| COG0136 | 0.67706 | COG2608 | 1.19206 | COG0242 | 0.96408 | COG0725 | 1.49758 |
| COG0028 | 0.81815 | COG0735 | 0.99656 | COG1012 | 1.06214 | COG1092 | 1.21653 |
| COG0079 | 0.94607 | COG1007 | 1.58196 | COG1011 | 1.30597 | COG0707 | 1.38952 |
| COG0057 | 0.79112 | COG1474 | 0.93944 | COG1204 | 1.16127 | COG0251 | 0.90564 |
| COG0141 | 0.85745 | COG0714 | 0.88056 | COG0614 | 1.25783 | COG1071 | 0.93362 |
| COG0455 | 0.63468 | COG0292 | 0.71503 | COG1697 | 0.77129 | COG1610 | 0.98618 |
| COG0312 | 1.16558 | COG1028 | 0.72986 | COG0802 | 1.30083 | COG1825 | 1.25711 |
| COG0128 | 1.01217 | COG0193 | 1.10100 | COG2511 | 1.02827 | COG0069 | 0.72027 |
| COG0256 | 0.78412 | COG0194 | 1.09254 | COG0189 | 1.07355 | COG1449 | 1.11889 |
| COG0142 | 0.90206 | COG1812 | 0.88485 | COG1717 | 1.01103 | COG1055 | 1.32442 |
| COG0704 | 1.22595 | COG0039 | 0.88071 | COG0381 | 1.34981 | COG0514 | 1.13109 |
| COG0006 | 1.07255 | COG1994 | 1.20078 | COG0432 | 1.08837 | COG0245 | 0.91995 |
| COG1241 | 1.05563 | COG0564 | 1.11510 | COG0430 | 1.07220 | COG1033 | 1.59165 |
| COG1109 | 0.89082 | COG1395 | 1.42286 | COG1526 | 1.49127 | COG5016 | 0.85651 |
| COG0082 | 0.65596 | COG1209 | 1.28124 | COG1386 | 1.18034 | COG1019 | 1.49034 |
| COG4992 | 1.07922 | COG0685 | 1.79410 | COG1382 | 0.72594 | COG2092 | 0.75181 |
| COG1122 | 1.17534 | COG1155 | 0.72354 | COG2264 | 1.42919 | COG2095 | 1.43483 |
| COG0458 | 0.75390 | COG1154 | 0.97881 | COG2265 | 1.25692 | COG0824 | 1.14305 |
| COG0396 | 0.98539 | COG1500 | 0.69556 | COG2109 | 1.14212 | COG0806 | 1.62414 |
| COG0172 | 0.90678 | COG2151 | 0.69136 | COG1909 | 1.32172 | COG2518 | 1.00022 |
| COG0587 | 1.08299 | COG1976 | 1.45881 | COG0478 | 1.23113 | COG0508 | 0.90555 |
| COG1080 | 0.91088 | COG0311 | 1.01857 | COG1144 | 0.75223 | COG0507 | 1.07365 |
| COG0527 | 0.87136 | COG1198 | 1.33928 | COG1940 | 1.03942 | COG1889 | 0.86414 |
| COG0557 | 1.08670 | COG0353 | 0.93423 | COG1948 | 1.52585 | COG1711 | 1.18547 |
| COG1890 | 1.08465 | COG1675 | 1.31539 | COG0308 | 1.48162 | COG3383 | 1.06813 |
| COG0096 | 0.69294 | COG1469 | 0.99360 | COG1162 | 1.30837 | COG0411 | 0.76793 |
| COG0147 | 0.84997 | COG0706 | 1.06714 | COG3118 | 0.63144 | COG0679 | 1.67907 |
| COG0167 | 0.95441 | COG1078 | 0.99323 | COG0776 | 0.56330 | COG2102 | 1.13618 |
| COG0169 | 0.98332 | COG1611 | 1.30807 | COG2041 | 1.31257 | COG1907 | 1.39847 |
| COG0108 | 0.84084 | COG0047 | 0.89445 | COG1436 | 1.30917 | COG0475 | 1.45187 |
| COG0107 | 0.65400 | COG0216 | 0.81089 | COG0751 | 1.76135 | COG0326 | 1.15121 |
| COG0595 | 0.95633 | COG0218 | 1.17666 | COG0281 | 0.82359 | COG1496 | 1.40852 |
| COG0124 | 0.97008 | COG0533 | 0.86977 | COG0285 | 1.12061 | COG1497 | 1.80597 |

|         |         |         |         |         |         |         |         |
|---------|---------|---------|---------|---------|---------|---------|---------|
| COG0180 | 1.01417 | COG1013 | 0.74062 | COG0135 | 0.93486 | COG2147 | 0.82323 |
| COG0499 | 0.60978 | COG0497 | 1.26682 | COG1084 | 1.21556 | COG2141 | 1.12313 |
| COG2875 | 1.16693 | COG2097 | 0.94983 | COG1066 | 0.84975 | COG0155 | 1.02946 |
| COG0516 | 0.70471 | COG0820 | 0.96876 | COG1607 | 0.95024 | COG0302 | 0.98926 |
| COG0476 | 0.92816 | COG2519 | 1.51247 | COG1245 | 0.97805 | COG0306 | 1.60423 |
| COG0154 | 0.69224 | COG0632 | 1.05555 | COG2004 | 1.36238 | COG0796 | 1.20696 |
| COG1304 | 1.16936 | COG0639 | 0.98137 | COG0076 | 1.63156 | COG0036 | 0.74242 |
| COG0361 | 0.43316 | COG0433 | 0.68741 | COG0070 | 1.04339 | COG1369 | 1.97057 |
| COG0118 | 1.06187 | COG2125 | 0.85881 | COG1290 | 0.59848 | COG1181 | 0.97375 |
| COG0112 | 0.94200 | COG1702 | 0.85241 | COG0711 | 1.21626 | COG0583 | 1.17626 |
| COG0719 | 1.00605 | COG0265 | 0.94958 | COG1838 | 0.75951 | COG0581 | 1.51238 |
| COG0717 | 0.84552 | COG0697 | 2.16941 | COG0050 | 0.44279 | COG1644 | 0.52858 |
| COG0503 | 0.82158 | COG0451 | 0.80314 | COG0053 | 1.44868 | COG1422 | 1.69756 |
| COG0192 | 0.55936 | COG1797 | 1.14790 | COG1024 | 0.92053 | COG0344 | 1.67371 |
| COG0198 | 0.55897 | COG1792 | 1.24772 | COG0858 | 0.91173 | COG0340 | 1.21850 |
| COG0202 | 0.69593 | COG5002 | 1.10840 | COG1003 | 0.76518 | COG1439 | 1.46642 |
| COG1005 | 1.01363 | COG0774 | 1.34896 | COG1767 | 1.68024 | COG1343 | 1.39888 |
| COG0483 | 1.30433 | COG0115 | 0.98237 | COG1997 | 0.60952 | COG0752 | 0.82190 |
| COG0481 | 0.66454 | COG1641 | 1.48532 | COG0226 | 0.98448 | COG1082 | 0.92789 |
| COG0568 | 0.44283 | COG0035 | 0.85042 | COG1570 | 1.47224 | COG0534 | 1.81292 |
| COG0556 | 0.79318 | COG0419 | 1.39131 | COG0811 | 0.74025 | COG1061 | 1.19285 |
| COG1394 | 1.22875 | COG1475 | 1.01311 | COG0812 | 1.16576 | COG0538 | 0.49461 |
| COG0148 | 0.81208 | COG1041 | 1.53101 | COG0624 | 1.11829 | COG1606 | 1.24210 |
| COG0443 | 0.52347 | COG1340 | 0.63471 | COG1258 | 1.51707 | COG1472 | 1.33457 |
| COG0322 | 0.95167 | COG0264 | 0.96710 | COG0640 | 0.56009 | COG0293 | 1.25130 |
| COG0371 | 1.17772 | COG5256 | 0.50613 | COG2138 | 0.92928 | COG1832 | 1.11229 |
| COG1354 | 1.28555 | COG1004 | 0.87420 | COG2236 | 1.22966 | COG0502 | 1.11265 |
| COG0125 | 1.53213 | COG1545 | 1.03234 | COG0682 | 1.30004 | COG0266 | 1.55102 |
| COG0065 | 0.73328 | COG4591 | 1.38432 | COG0683 | 1.44488 | COG0268 | 1.06097 |
| COG1503 | 0.79035 | COG0603 | 1.10170 | COG1951 | 1.11886 | COG0038 | 1.18332 |
| COG0187 | 0.69890 | COG0551 | 1.08648 | COG1959 | 1.22895 | COG0204 | 1.37698 |
| COG0184 | 0.50182 | COG0424 | 1.03253 | COG0327 | 1.39259 | COG1547 | 1.40147 |
| COG0040 | 0.99863 | COG1117 | 0.78401 | COG0782 | 0.84838 | COG2524 | 1.15283 |
| COG0492 | 0.82274 | COG0663 | 1.04818 | COG1781 | 0.79345 | COG1577 | 1.13756 |
| COG1718 | 1.32372 | COG1131 | 0.74368 | COG0313 | 1.14655 | COG2085 | 1.37927 |
| COG0653 | 0.80515 | COG2237 | 1.68585 | COG1371 | 0.92446 | COG0818 | 1.58719 |
| COG0436 | 0.84159 | COG0466 | 0.74537 | COG0763 | 1.79110 | COG1741 | 1.29836 |
| COG0305 | 0.93466 | COG1159 | 1.18971 | COG1327 | 1.13020 | COG0553 | 1.47186 |
| COG0178 | 0.73279 | COG0144 | 1.35009 | COG1321 | 0.83275 | COG0629 | 0.98506 |
| COG0585 | 1.60715 | COG1217 | 0.87300 | COG0298 | 0.70360 | COG2271 | 1.56800 |
| COG0284 | 1.25229 | COG0787 | 1.48488 | COG1736 | 1.21198 | COG1250 | 0.72322 |
| COG0134 | 1.10775 | COG0324 | 1.09278 | COG1094 | 0.98090 | COG1253 | 1.96277 |
| COG1601 | 0.71133 | COG0320 | 0.80097 | COG0336 | 0.92780 | COG1911 | 0.75784 |
| COG0077 | 1.03101 | COG0315 | 1.04253 | COG0270 | 0.91029 | COG0409 | 0.68974 |
| COG0075 | 1.01752 | COG1199 | 1.26756 | COG0277 | 0.91609 | COG2804 | 1.12935 |
| COG1836 | 1.29462 | COG1195 | 1.54378 | COG0240 | 1.26614 | COG1931 | 1.06532 |
| COG0540 | 1.03167 | COG0109 | 1.22645 | COG0243 | 1.31738 | COG1936 | 1.90669 |
| COG1236 | 1.17371 | COG0359 | 1.07742 | COG1045 | 0.91055 | COG0464 | 0.74972 |
| COG1234 | 0.98608 | COG1405 | 0.33035 | COG0217 | 0.81506 | COG2219 | 1.44477 |
| COG0689 | 0.55839 | COG1095 | 0.80195 | COG1032 | 0.96888 | COG1211 | 1.18723 |
| COG1157 | 0.52004 | COG1674 | 1.02340 | COG0842 | 1.86255 | COG1958 | 0.41729 |
| COG0440 | 0.60088 | COG0334 | 0.90623 | COG0022 | 0.68711 | COG0325 | 1.14396 |
| COG0163 | 0.99505 | COG0337 | 1.07665 | COG1779 | 1.43505 | COG1194 | 0.95444 |
| COG0164 | 0.95379 | COG1466 | 1.90513 | COG0235 | 1.18436 | COG0370 | 1.15665 |
| COG0314 | 1.30155 | COG0272 | 1.15644 | COG1010 | 0.97342 | COG1351 | 0.44773 |
| COG0101 | 1.16739 | COG1632 | 0.71340 | COG0494 | 1.13153 | COG0122 | 1.11726 |

|         |         |         |         |         |         |         |         |
|---------|---------|---------|---------|---------|---------|---------|---------|
| COG0592 | 1.48355 | COG1215 | 1.35176 | COG1201 | 1.13673 | COG0254 | 0.52810 |
| COG0593 | 1.19911 | COG0233 | 0.94591 | COG1243 | 0.95016 | COG1862 | 0.90070 |
| COG0258 | 0.95117 | COG0491 | 1.45490 | COG0617 | 1.18132 | COG1409 | 0.80097 |
| COG0062 | 1.21055 | COG1200 | 1.07820 | COG0619 | 1.41570 | COG0726 | 0.83126 |
| COG0186 | 0.58232 | COG0805 | 1.74262 | COG0803 | 1.41576 | COG1096 | 1.81187 |
| COG0029 | 0.86727 | COG1225 | 0.89842 | COG0575 | 1.20438 | COG1098 | 1.19561 |
| COG2896 | 0.96879 | COG0509 | 0.95793 | COG1508 | 1.35495 | COG2019 | 0.85187 |
| COG1985 | 1.09801 | COG0388 | 1.25387 | COG3839 | 0.55353 | COG1845 | 1.14848 |
| COG0615 | 0.82511 | COG2872 | 0.97568 | COG2123 | 1.03901 | COG1287 | 1.36792 |
| COG0083 | 1.27694 | COG1381 | 1.62398 | COG0416 | 1.23690 | COG1073 | 1.01576 |
| COG0304 | 0.91093 | COG0417 | 0.96819 | COG0677 | 1.20971 | COG0274 | 0.99242 |
| COG0173 | 0.76868 | COG0674 | 0.89949 | COG1104 | 0.93601 | COG1581 | 0.45232 |
| COG1187 | 1.38366 | COG2814 | 1.69719 | COG0511 | 0.65440 | COG0213 | 0.88215 |
| COG0133 | 0.67322 | COG1108 | 1.07478 | COG0474 | 1.19557 | COG0843 | 0.86461 |
| COG1855 | 1.23694 | COG0513 | 0.85539 | COG0691 | 0.81610 | COG0841 | 1.38130 |
| COG0071 | 0.94871 | COG1903 | 1.11166 | COG0328 | 0.92432 | COG0849 | 1.48285 |
| COG0521 | 1.27099 | COG1120 | 1.60782 | COG0457 | 2.12552 | COG4651 | 1.46416 |
| COG0222 | 0.79697 | COG1167 | 1.26835 | COG1328 | 0.88951 | COG0535 | 0.91316 |
| COG0486 | 1.01756 | COG1183 | 0.45413 | COG0391 | 0.86541 | COG5011 | 1.40574 |
| COG0565 | 1.60466 | COG0771 | 1.38120 | COG1947 | 1.60926 | COG0239 | 1.04314 |
| COG0561 | 1.63056 | COG0773 | 1.05234 | COG0301 | 1.02523 | COG1549 | 1.65402 |
| COG1270 | 1.42894 | COG0345 | 1.01348 | COG0795 | 1.67390 | COG0555 | 1.23044 |
| COG1190 | 0.89331 | COG1432 | 0.28719 | COG0031 | 1.02838 | COG1539 | 1.41428 |
| COG0105 | 0.64453 | COG0287 | 1.14097 | COG1189 | 1.44390 | COG1561 | 1.45297 |
| COG0120 | 1.06911 | COG0138 | 0.87677 | COG0770 | 1.12178 | COG0573 | 1.31412 |
| COG0159 | 1.13529 | COG0536 | 0.97498 | COG0116 | 1.37324 | COG0631 | 0.87550 |
| COG1587 | 1.60049 | COG1060 | 1.31261 | COG0758 | 1.26108 | COG0637 | 1.46259 |
| COG0042 | 1.14244 | COG1600 | 1.17508 | COG1088 | 0.71513 |         |         |
