# Supplementary material for: Universal Pacemaker of Genome Evolution
Source: PubMed Central journal article supplement (PMC3510094; doi:10.1371/journal.pcbi.1002785), 2012-11-29

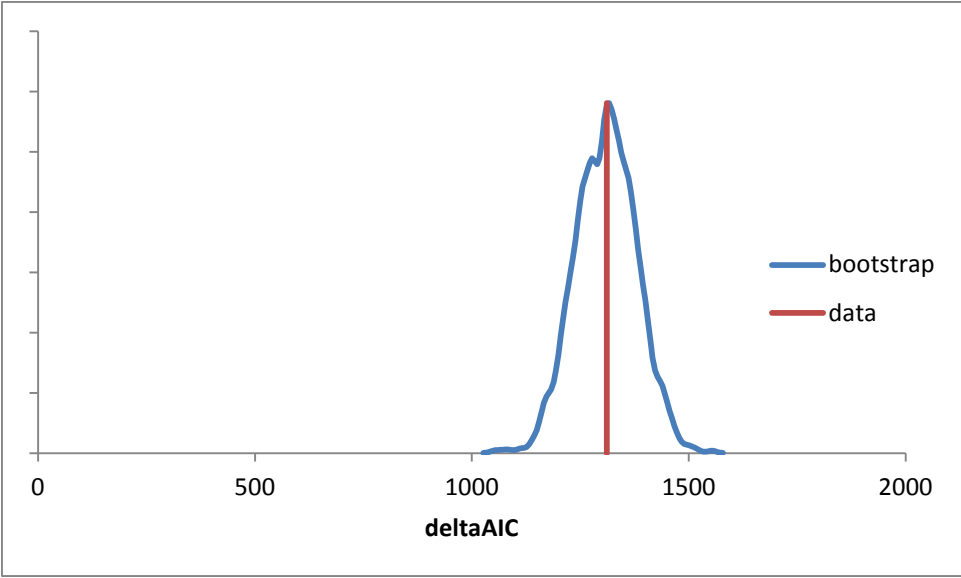

Supplement: pcbi.1002785.s002.pdf [file pcbi.1002785.s002.pdf]
