# Supplementary material for: Universal Pacemaker of Genome Evolution
Source: PubMed Central journal article supplement (PMC3510094; doi:10.1371/journal.pcbi.1002785), 2012-11-29
Supplement: pcbi.1002785.s003.pdf [file pcbi.1002785.s003.pdf]

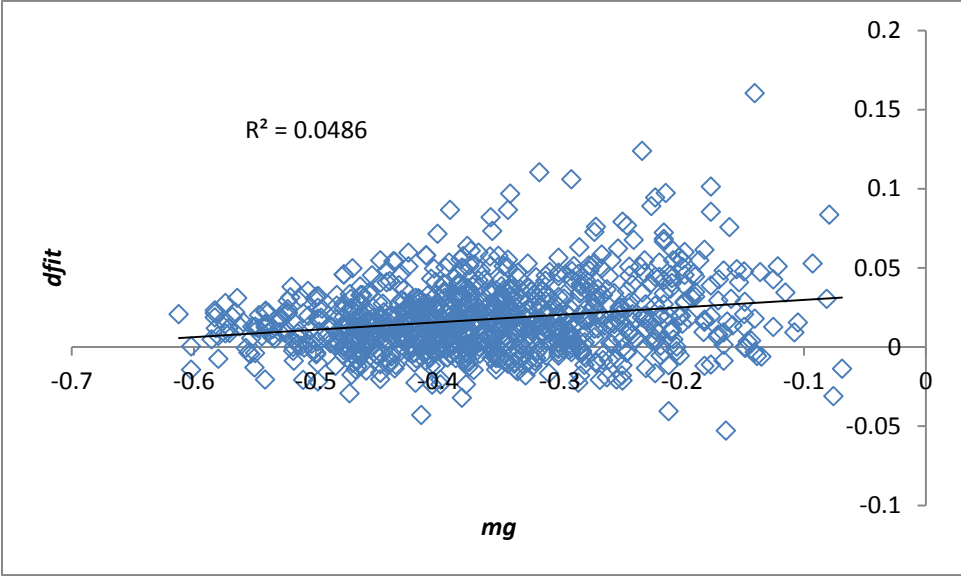

A

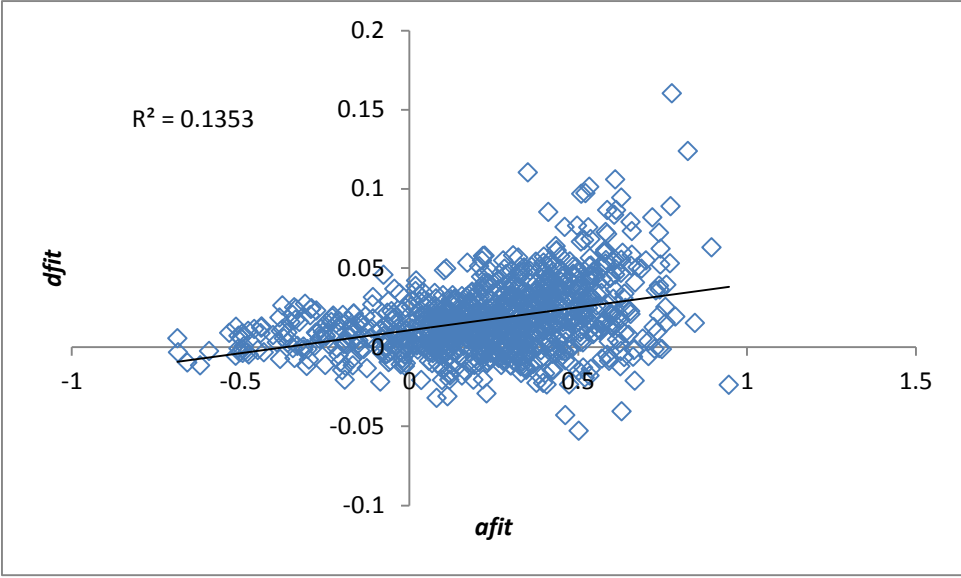

B

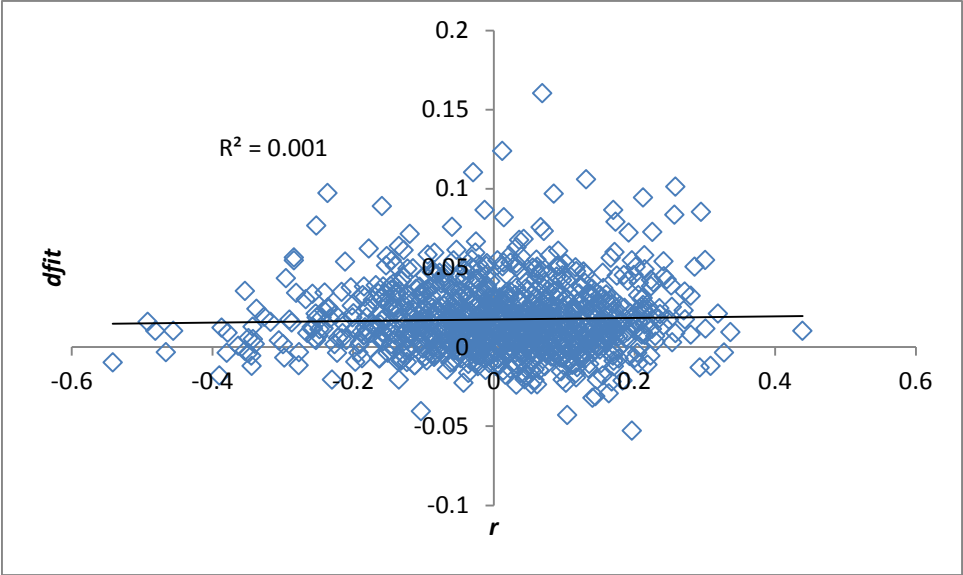

C
